# Supplementary material for: Melatonin synergizes BRAF‐targeting agent dabrafenib for the treatment of anaplastic thyroid cancer by inhibiting AKT/hTERT signalling
Source: PubMed Central journal article supplement (PMC7579709; doi:10.1111/jcmm.15854), 2020-09-15

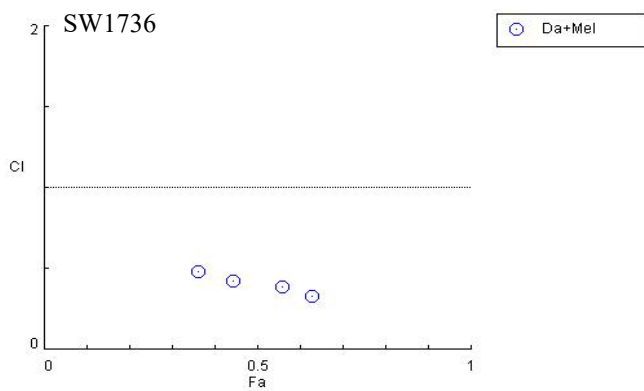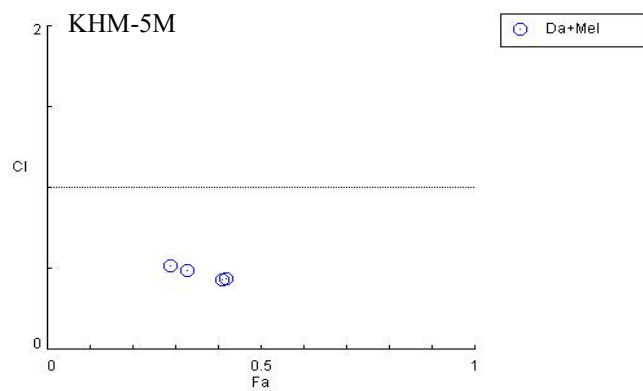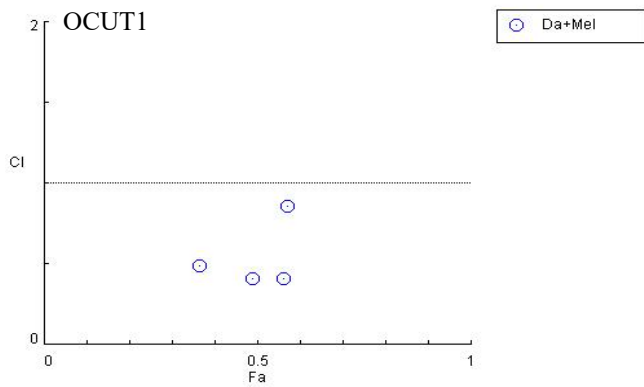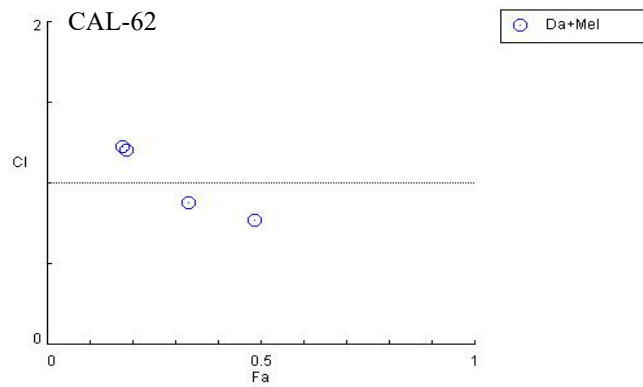

Supplement: JCMM-24-12119-s001.pdf [file JCMM-24-12119-s001.pdf]
